# Supplementary material
Source: HighWire-hosted journal article supplement (http://ajnr-stage2.highwire.org/highwire/filestream/52146/field_highwire_adjunct_files/1/Tables.pdf)
Supplement: Tables.pdf [file Tables.pdf]

TABLE 1: Preoperative characteristics of eight patients who underwent craniocervical decompression

| Patient (No.) | Occipital Headache | Valsalva-Induced Headache | Motor | Sensory | Cranial Nerve Dysfunction | Syrinx | Caudad Pre-op | Cephalad Pre-op |
|---------------|--------------------|---------------------------|-------|---------|---------------------------|--------|---------------|-----------------|
| 1 J B         | +                  | +                         | 0     | 0       | +                         | 0      | 1.5           | 3               |
| 2 T C         | +                  | +                         | 0     | +       | 0                         | 0      | 1.8           | 3.8             |
| 3 A Z         | +                  | 0                         | +     | +       | +                         | 0      | 2             | 2.5             |
| 4 J S         | +                  | +                         | +     | 0       | 0                         | yes    | 3.3           | 3.3             |
| 5 N A         | +                  | +                         | 0     | 0       | +                         | yes    | 3.4           | 14.2            |
| 6 J P         | +                  | +                         | +     | +       | 0                         | yes    | 3.5           | 4.5             |
| 7 C T         | 0                  | 0                         | 0     | +       | +                         | yes    | 4.5           | 8.9             |
| 8 M S         | +                  | 0                         | +     | +       | +                         | 0      | 7.3           | 14.6            |

TABLE 2: Outcomes of eight patients who underwent craniocervical decompression

| Patient (No.) | Occipital Headache | Valsalva-Induced Headache | Motor    | Sensory | Cranial Nerve Dysfunction | Syrinx    | Percent Change, Postop |          |
|---------------|--------------------|---------------------------|----------|---------|---------------------------|-----------|------------------------|----------|
|               |                    |                           |          |         |                           |           | Caudad                 | Cephalad |
| 1 J B         | Resolved           | Resolved                  | 0        | 0       | Resolved                  | 0         | 7%                     | 43%      |
| 2 T C         | Resolved           | Resolved                  | 0        | +       | 0                         | 0         | 28%                    | -11%     |
| 3 A Z         | Resolved           | 0                         | Resolved | +       | Resolved                  | 0         | -35%                   | -16%     |
| 4 J S         | Resolved           | Resolved                  | Resolved | 0       | 0                         | No change | -30%                   | 61%      |
| 5 N A         | Resolved           | Resolved                  | 0        | 0       | +                         | No change | -32%                   | -71%     |
| 6 J P         | Resolved           | Resolved                  | Resolved | +       | 0                         | No change | -34%                   | -44%     |
| 7 C T         | 0                  | 0                         | 0        | +       | +                         | Smaller   | -38%                   | -58%     |
| 8 M S         | Resolved           | 0                         | Resolved | +       | Resolved                  | 0         | -37%                   | -63%     |
